# Supplementary material
Source: PubMed Central journal article supplement (PMC10848846)
Supplement: spectrum.02215-23-s0001.pdf [file spectrum.02215-23-s0001.pdf]

## Supplementary Materials

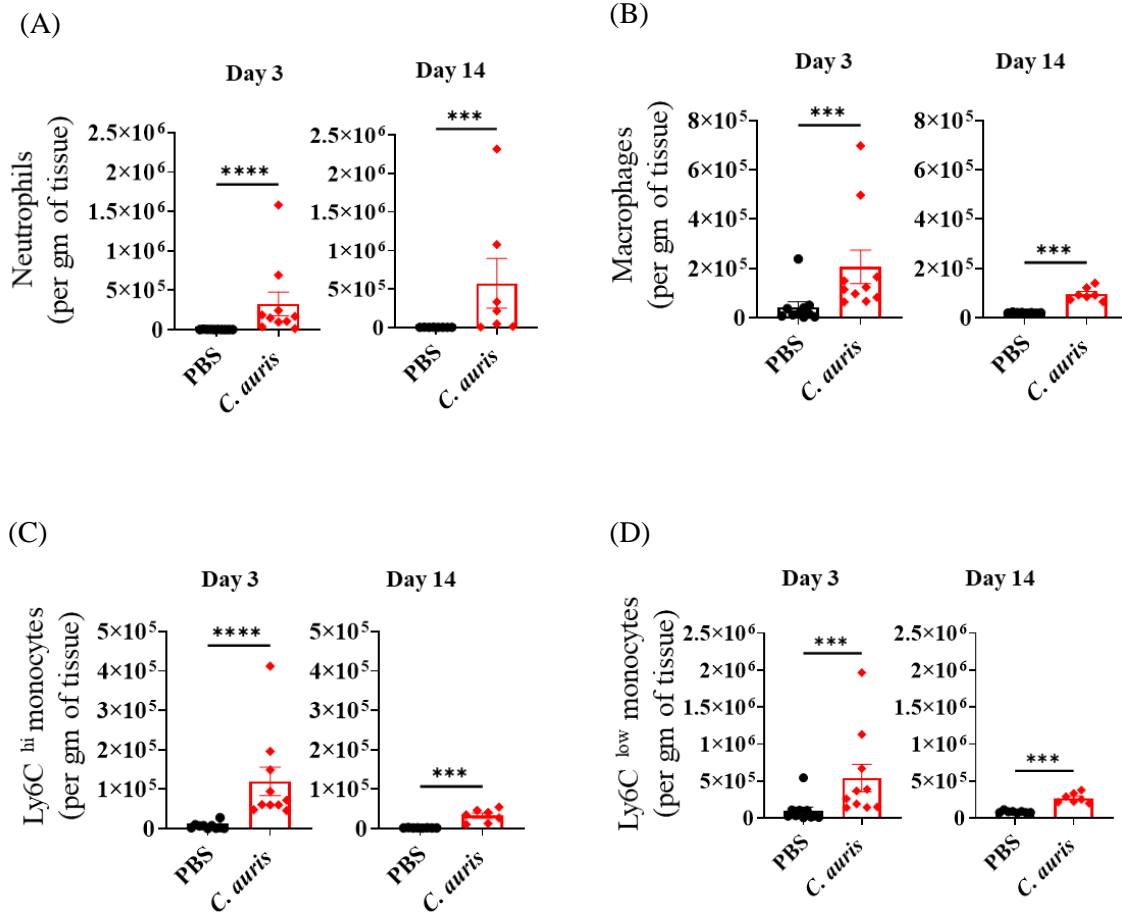

**Supplementary Figure 1.** Absolute number of phagocytic cells in the skin tissue of PBS (or) *C. auris* infected mice. Mice were injected intradermally with PBS (or) infected intradermally with *C. auris* 0387. Mice were euthanized after 3 days and 14 days post-infection. Absolute number of (A) CD11b+ Ly6G+ neutrophils (B) CD11b+ MHC-II+ CD64+ macrophages and (C) CD11b+ Ly6C<sup>hi</sup> monocytes and (D) CD11b+ Ly6C<sup>low</sup> monocytes in PBS (or) *C. auris* infected mice after 3- and 14-days post-infection were shown. 7-10 mice were used for each group and data represented were mean ± SEM for each group. Statistical significance was calculated using Mann-Whitney U test. \*\*\* $p \leq 0.001$ , \*\*\*\* $p \leq 0.0001$  were considered as significant.

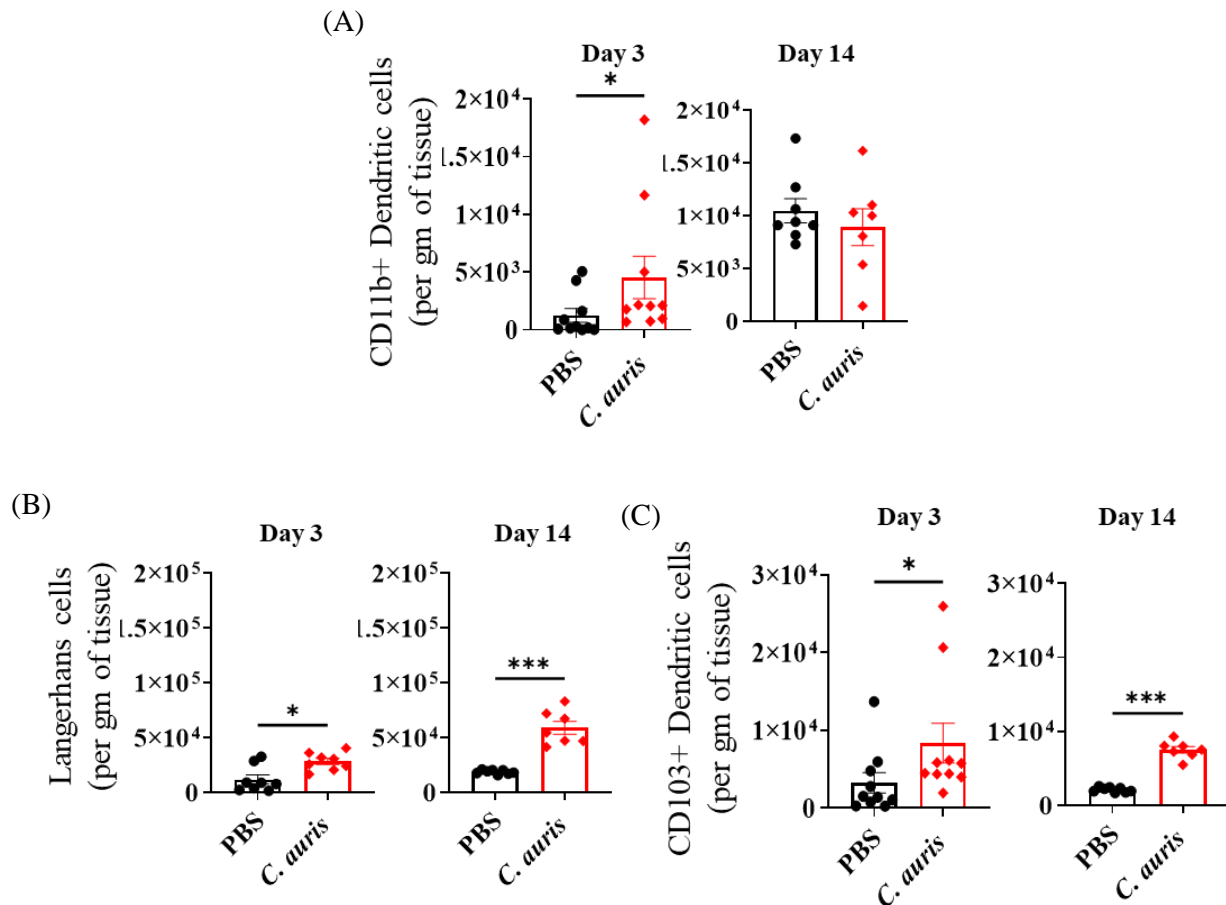

**Supplementary Figure 2.** Absolute number of antigen presenting cells in the skin tissue of PBS (or) *C. auris* infected mice. Mice were injected intradermally with PBS (or) infected intradermally with *C. auris* 0387. Mice were euthanized after 3 days and 14 days post-infection. Absolute number of (A) CD11b+CD207<sup>-</sup> cells (CD11b+ dendritic cells), (B) CD11b+CD207<sup>+</sup> cells (Langerhans cells), and (C) CD11b<sup>-</sup>CD207<sup>+</sup> cells (CD103+ dendritic cells) in PBS (or) *C. auris* infected mice after 3- and 14-days post-infection were shown. 7-10 mice were used for each group and data represented were mean ± SEM for each group. Statistical significance was calculated using Mann-Whitney U test. \* $p \leq 0.05$ , \*\*\* $p \leq 0.001$  were considered as significant.

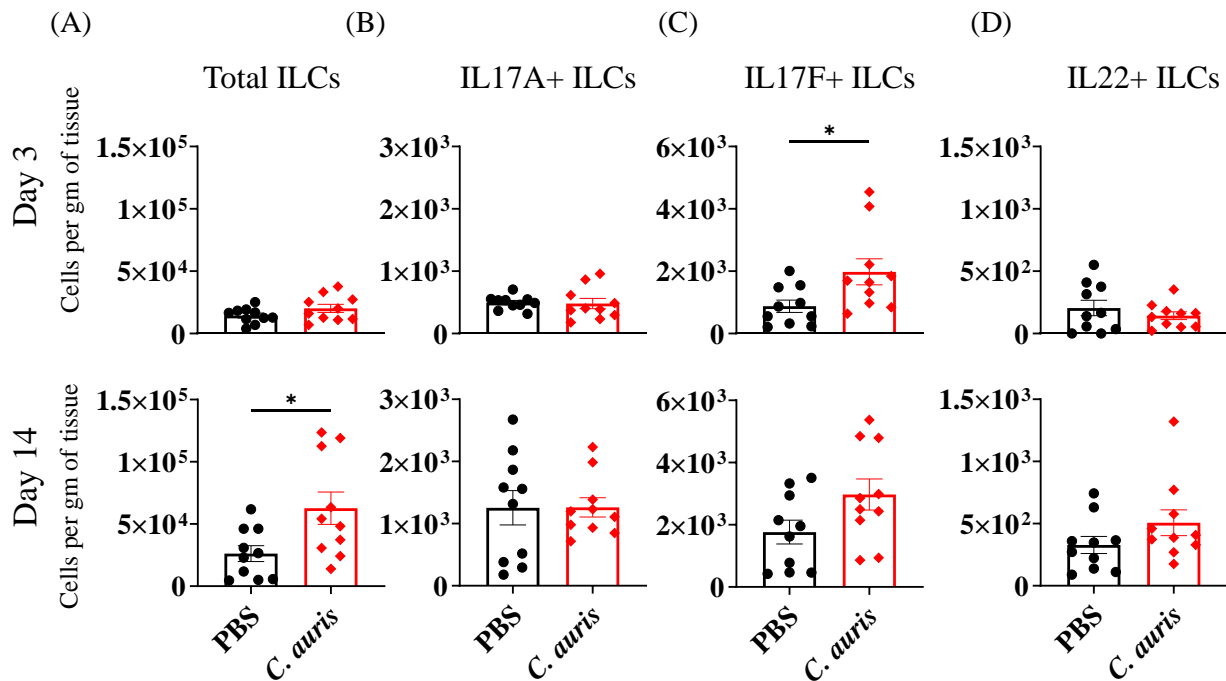

**Supplementary Figure 3.** Absolute number of ILCs in the skin tissue of PBS (or) *C. auris* infected mice. Mice were injected intradermally with PBS (or) infected intradermally with *C. auris* 0387. Mice were euthanized after 3 days and 14 days post-infection. Absolute number of (A) Total ILCs, (B) IL17A+ ILCs, (C) IL17F+ ILCs and (D) IL22+ ILCs in PBS (or) *C. auris* infected mice after 3- and 14-days post-infection were shown. 10 mice were used for each group and data represented were mean  $\pm$  SEM for each group. Statistical significance was calculated using Mann-Whitney U test. \* $p \leq 0.05$  was considered as significant.

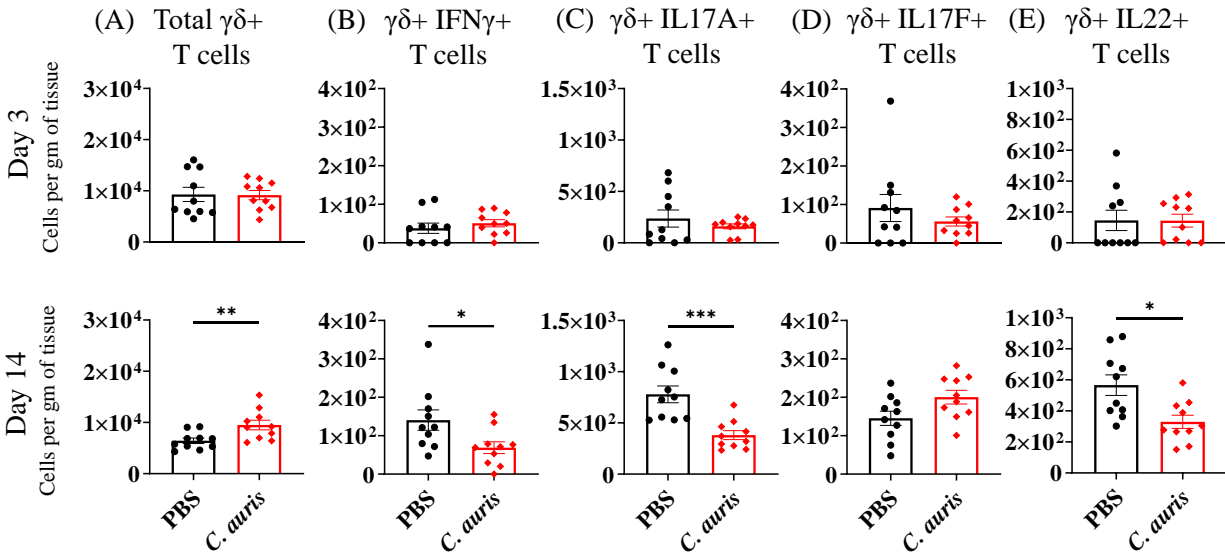

**Supplementary Figure 4.** Absolute number of  $\gamma\delta^+$  cells in the skin tissue of PBS (or) *C. auris* infected mice. Mice were injected intradermally with PBS (or) infected intradermally with *C. auris* 0387. Mice were euthanized after 3 days and 14 days post-infection. (A - E) Absolute numbers of total  $\gamma\delta^+$  cells,  $\gamma\delta^+$  IFN $\gamma^+$ ,  $\gamma\delta^+$  IL17A $^+$ ,  $\gamma\delta^+$  IL17F $^+$  and  $\gamma\delta^+$  IL22 $^+$  T cells in PBS (or) *C. auris* infected mice skin tissue after 3- and 14-days post-infection were shown respectively. 10 mice were used for each group and data represented were mean  $\pm$  SEM for each group. Statistical significance was calculated using Mann-Whitney U test. \*p  $\leq$  0.05, \*\*p  $\leq$  0.01, \*\*\*p  $\leq$  0.001 were considered as significant.

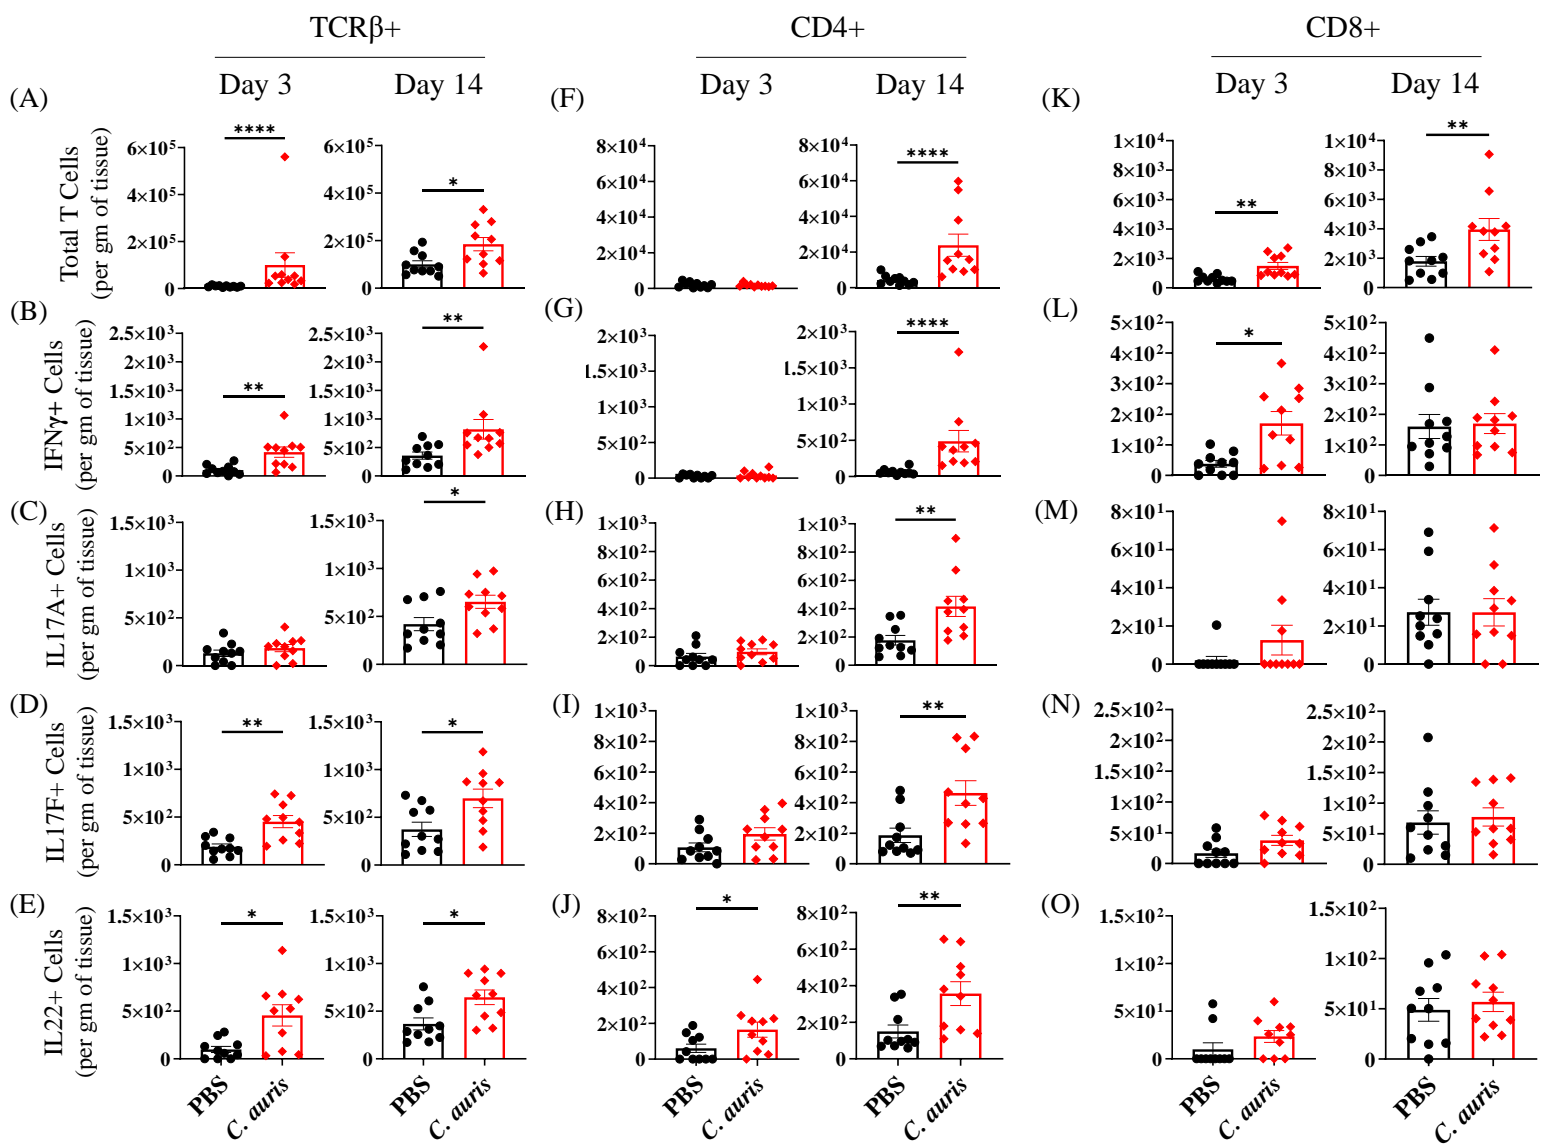

**Supplementary Figure 5.** Absolute number of TCRβ+ cells in the skin tissue of PBS (or) *C. auris* infected mice. Mice were injected intradermally with PBS (or) infected intradermally with *C. auris* 0387. Mice were euthanized after 3 days and 14 days post-infection. (A - E) Absolute numbers of total TCRβ+ cells, TCRβ IFNγ+, TCRβ+ IL17A+, TCRβ+ IL17F+ and TCRβ+ IL22+ T cells in PBS (or) *C. auris* infected mice skin tissue after 3- and 14-days post-infection were shown respectively. (F - J) Absolute numbers of total of total CD4+ cells, CD4+ IFNγ+, CD4+ IL17A+,

CD4<sup>+</sup> IL17F<sup>+</sup> and CD4<sup>+</sup> IL22<sup>+</sup> T cells in PBS (or) *C. auris* infected mice skin tissue after 3- and 14-days post-infection were shown respectively. (**K - O**) Absolute numbers of total of total CD8<sup>+</sup> cells, CD8<sup>+</sup> IFN $\gamma$ <sup>+</sup>, CD8<sup>+</sup> IL17A<sup>+</sup>, CD8<sup>+</sup> IL17F<sup>+</sup> and CD8<sup>+</sup> IL22<sup>+</sup> T cells in PBS (or) *C. auris* infected mice skin tissue after 3- and 14-days post-infection were shown respectively. 10 mice were used for each group and data represented were mean  $\pm$  SEM for each group. Statistical significance was calculated using Mann-Whitney U test. \* $p \leq 0.05$ , \*\* $p \leq 0.01$ , \*\*\*\* $p \leq 0.0001$  were considered as significant.
